# Supplementary material
Source: Springer Nature journal article supplement (https://www.springermedizin.de/resource/supplementary/12874_2008_317_MOESM1_ESM.pdf/9434236)

Disease severity

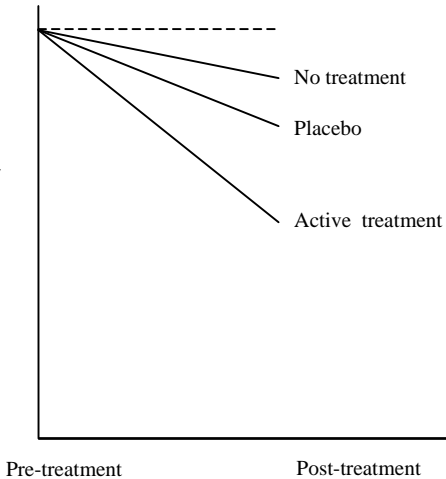

Pre-treatment

Post-treatment

No treatment

Placebo

Active treatment

Supplement: MOESM1 [file 9434236]
